# Supplementary material
Source: Springer Nature journal article supplement (https://www.springermedizin.de/resource/supplementary/12876_2003_70_MOESM3_ESM.pdf/9438644)

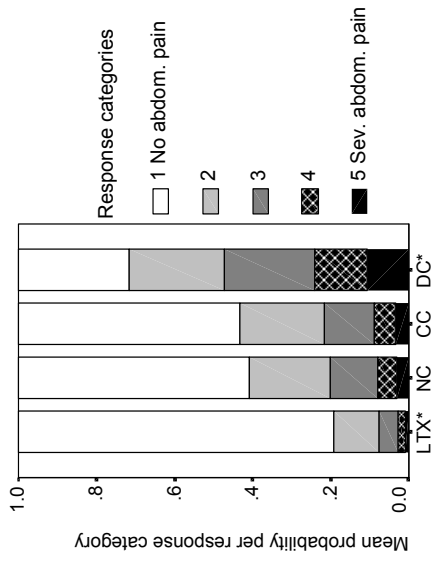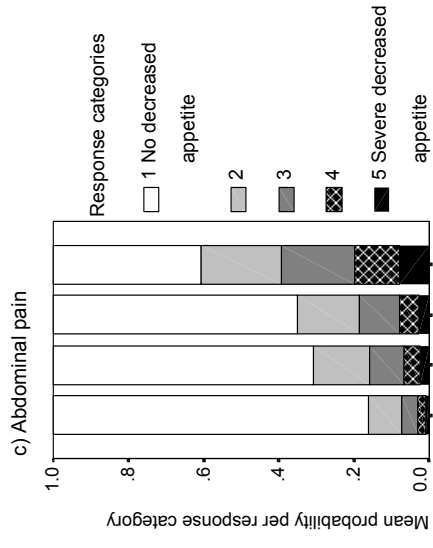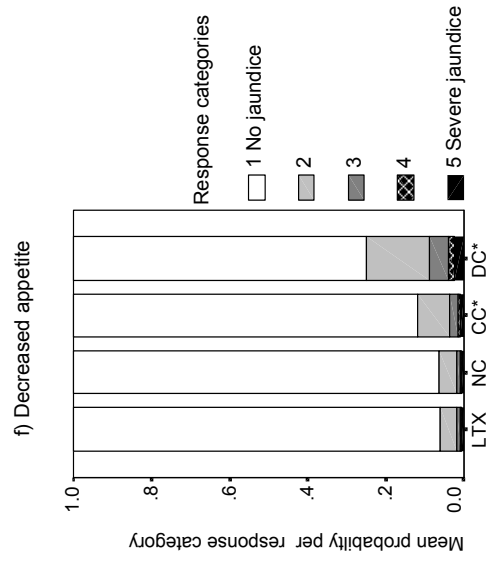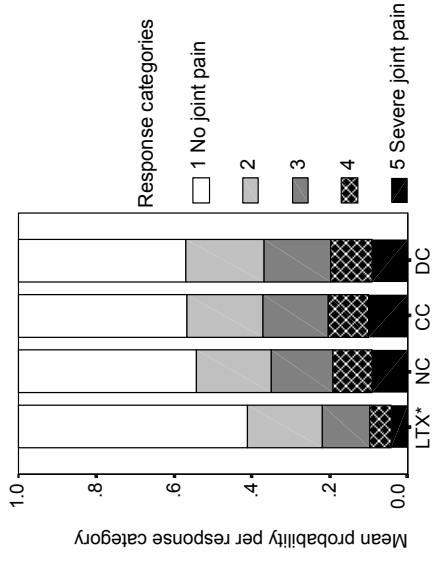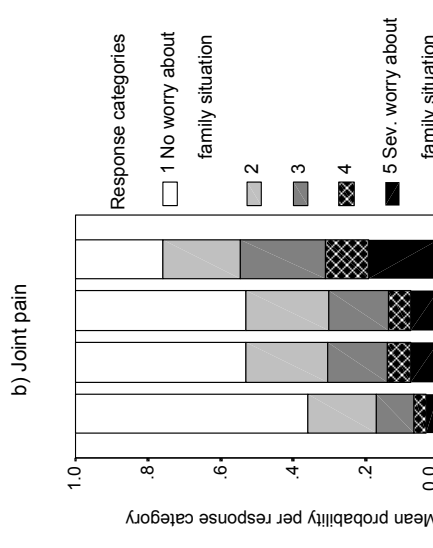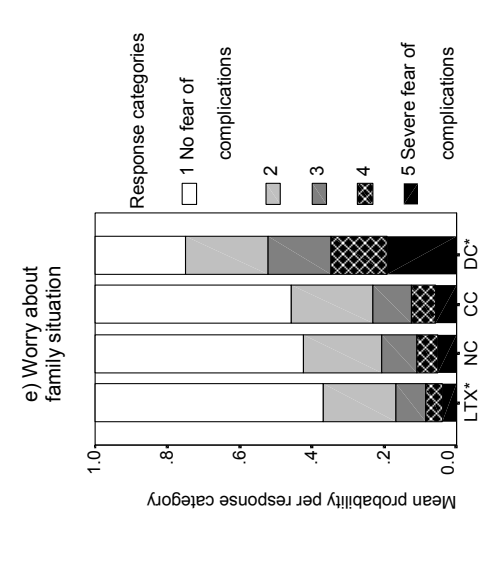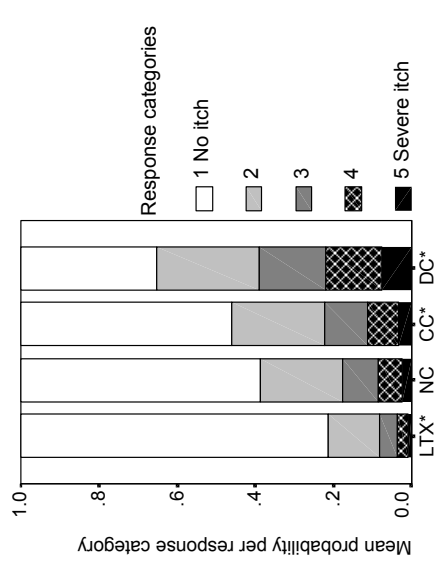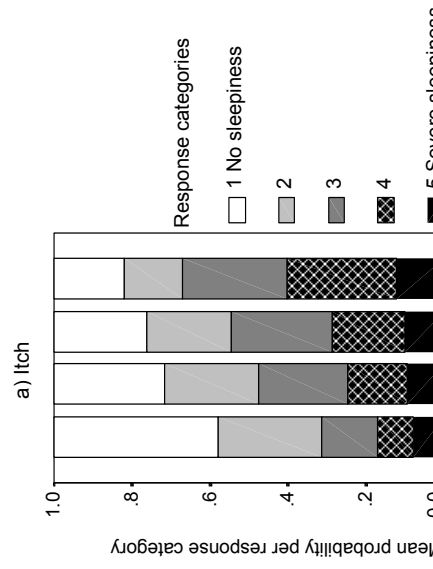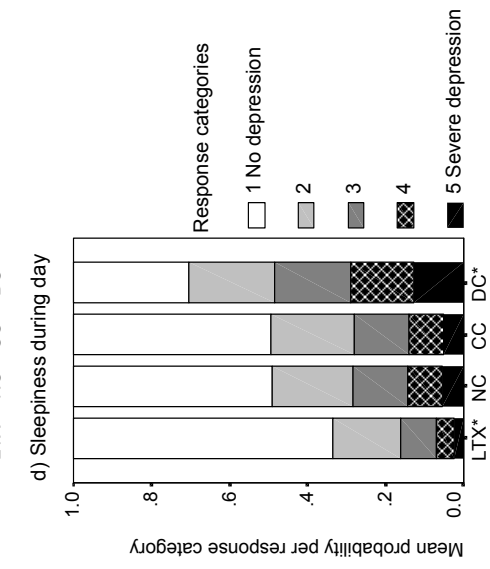

i) Jaundice

h) Fear of complications

g) Depression

Supplement: MOESM3 [file 9438644]
